# Supplementary material for: A highly sensitive LC-MS/MS method for the determination and quantification of a recently identified N-nitrosamine impurity in the sitagliptin phosphate monohydrate active pharmaceutical ingredient
Source: Royal Society of Chemistry journal article supplement (doi:10.1039/d2ay01821g), 2022-12-16
Supplement: d2ay01821g1.pdf [file d2ay01821g1.pdf]

**A highly sensitive LC-MS/MS method for determination and  
quantification of a recently identified N-nitrosamine impurity in the  
sitagliptin phosphate monohydrate active pharmaceutical ingredient**

Zhen Wang,<sup>\*a</sup> Shujun Hu,<sup>b</sup> Xiaoying Wu,<sup>b</sup> Zuwei He,<sup>b</sup> Chunlong Ke,<sup>b</sup> and Miaomiao Hu<sup>b</sup>

*<sup>a</sup>Department of Chemistry, Yuquan Campus, Zhejiang University, Hangzhou 310058, China. E-mail:  
896698921@qq.com*

*<sup>b</sup>Chemical Process Research and Development, Zhejiang Tianyu Pharmaceutical Co., Ltd.  
Taizhou, 318020, China*

## **Supporting information**

Chromatogram and MS/MS spectra of NTTTP at different collision energies. MS source parameters. Data obtained in method repeatability study.

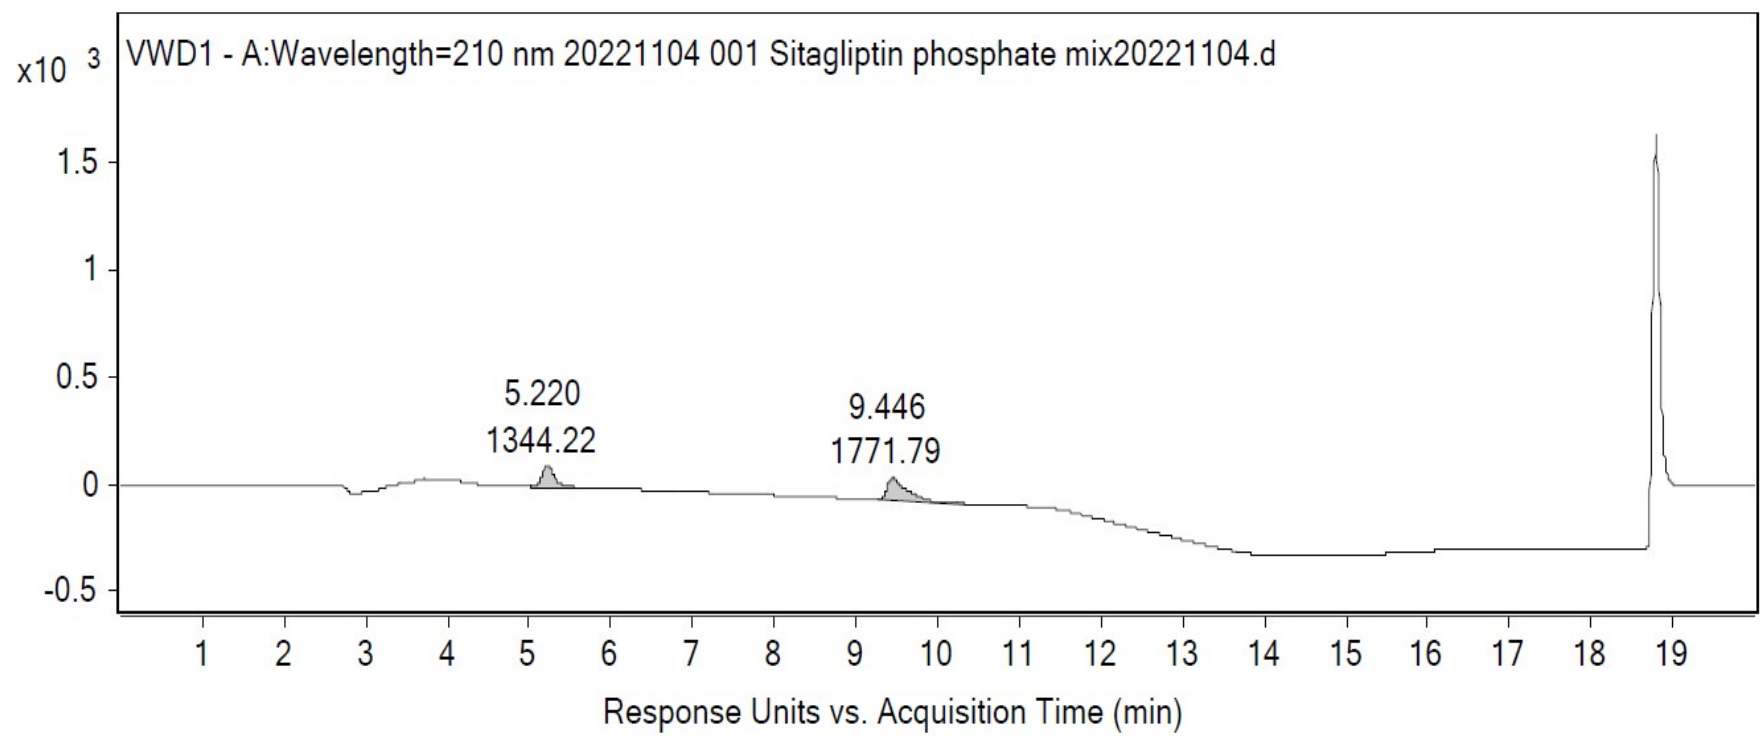

Figure S1. Chromatogram of sitagliptin phosphate monohydrate and NTTTP on ZORBAX SB-C18 column

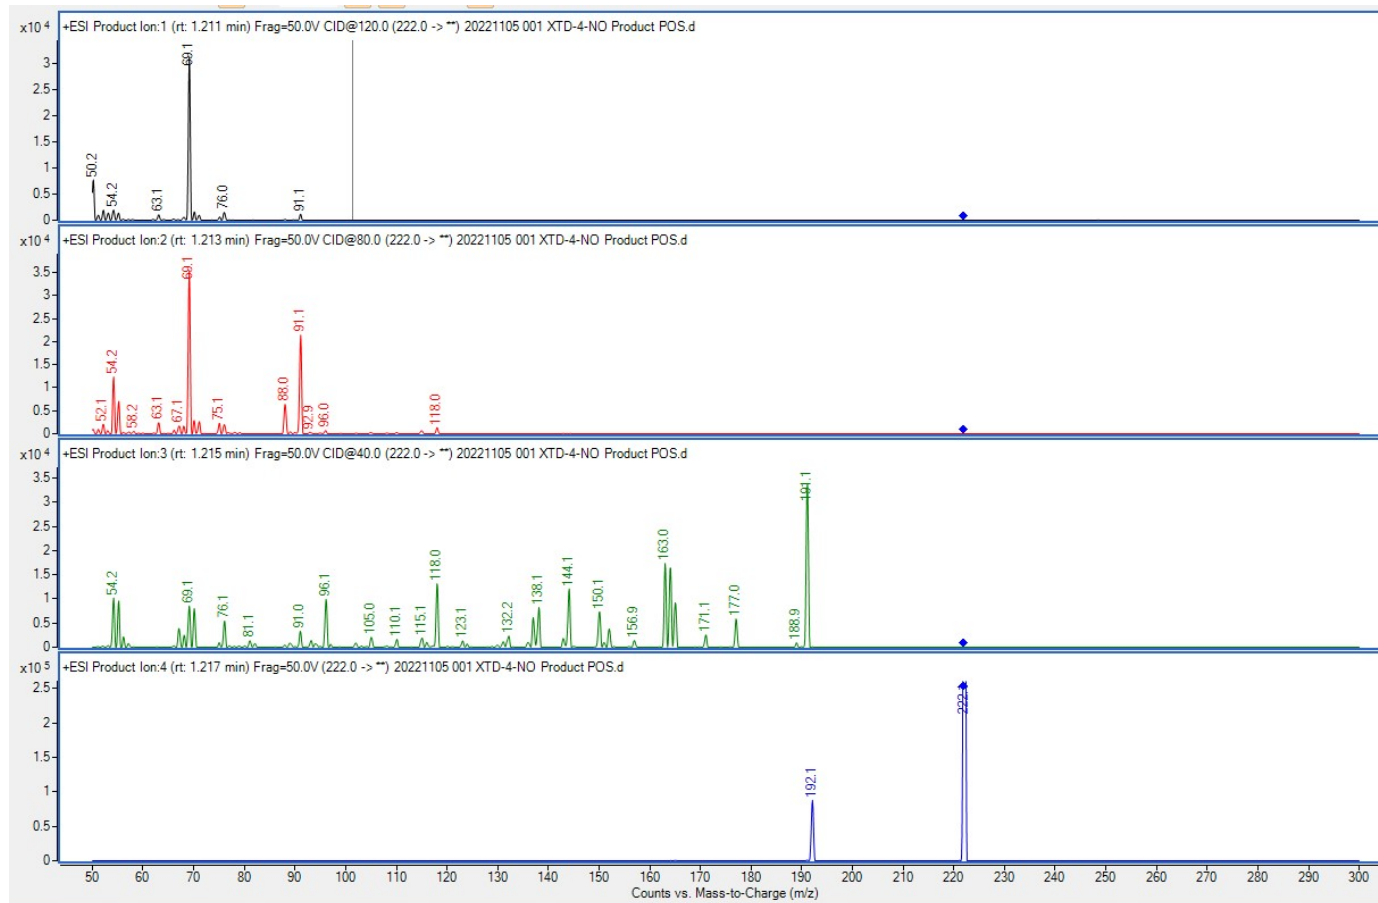

Figure S2. MS/MS spectra of NTTP at different collision energies (0, 40, 80 and 120 V)

Table S1. MS source parameters

| Parameter              | Value (+) |
|------------------------|-----------|
| Gas temperature (°C)   | 300       |
| Gas flow (l/min)       | 8         |
| Nebulizer (psi)        | 45        |
| Sheath Gas Heater (°C) | 300       |
| Sheath gas flow        | 11        |
| Capillary (V)          | 3500      |
| V Charging             | 500       |

Table S2. Data obtained in method repeatability study.

|                            | Injection #  | NTTP        |
|----------------------------|--------------|-------------|
| <b>Area (at 0.098 ppm)</b> | 1            | 661         |
|                            | 2            | 666         |
|                            | 3            | 620         |
|                            | <b>RSD %</b> | <b>3.89</b> |
| <b>Area (at 0.370 ppm)</b> | 1            | 2263        |
|                            | 2            | 2266        |
|                            | 3            | 2254        |
|                            | <b>RSD %</b> | <b>0.28</b> |
| <b>Area (at 0.925 ppm)</b> | 1            | 5067        |
|                            | 2            | 5057        |
|                            | 3            | 5036        |
|                            | <b>RSD %</b> | <b>0.31</b> |
